# Supplementary material for: An indenocarbazole-based host material for solution processable green phosphorescent organic light emitting diodes
Source: Royal Society of Chemistry journal article supplement (doi:10.1039/d1ra04855d), 2021-01-01
Supplement: d1ra04855d1.pdf [file d1ra04855d1.pdf]

## Supplementary Information

### **An indenocarbazole-based host material for solution processable green phosphorescent organic light emitting diodes**

Eun Young Park<sup>a</sup>, Da Hwan Lee<sup>a</sup>, Le Thi Na<sup>a</sup>, Chol-Min Shin<sup>b</sup>, Jihoon Lee<sup>b,\*</sup>, Min Chul Suh<sup>a,\*</sup>

<sup>1</sup>Department of Information Display, Kyung Hee University, Seoul 02447, Republic of Korea

<sup>2</sup>Department of Polymer Science and Engineering & Department of IT·Energy Convergence (BK21 FOUR), Korea National University of Transportation, Chungju 27469, Republic of Korea

\*Corresponding author: [mcsuh@khu.ac.kr](mailto:mcsuh@khu.ac.kr)

ORCID

Min Chul Suh: 0000-0002-1295-1693

Present Addresses

Department of Information Display, Kyung Hee University, Seoul 02447, Republic of Korea

**Table 1S.** Comparison of solubilities for several arylamine compounds (Unit: mg/mL)

| Solvents      | PCIC (this work) | CBP | NPB    |
|---------------|------------------|-----|--------|
| Toluene       | 120              | 9   | < 0.05 |
| Chlorobenzene | 104              | 19  | < 0.05 |

CBP: 4,4'-Bis(N-carbazolyl)-1,1'-biphenyl

NPB: N,N'-Di(1-naphthyl)-N,N'-diphenyl-(1,1'-biphenyl)-4,4'-diamine

### Device Configuration

**Device A :** ITO / AQ1200 (40 nm) / X-HTL (15 nm) / PCIC:Ir(mppy)<sub>3</sub> (30 nm, 5 mol%) / B-EBL (5 nm) / TPBI (35 nm) / LiF (1 nm) / Al (100 nm)

**Device B :** ITO / AQ1200 (40 nm) / X-HTL (15 nm) / PCIC:Ir(mppy)<sub>3</sub> (30 nm, 5 mol%) / B-EBL (3 nm) / BH:DH (15 nm) / TPBI (22 nm) / LiF (1 nm) / Al (100 nm)

**Device C :** ITO / AQ1200 (40 nm) / X-HTL (15 nm) / PCIC:Ir(mppy)<sub>3</sub> (30 nm, 5 mol%) / B-EBL (5 nm) / BH:DH (15 nm) / TPBI (20 nm) / LiF (1 nm) / Al (100 nm)

**Device D :** ITO / AQ1200 (40 nm) / X-HTL (15 nm) / PCIC:Ir(mppy)<sub>3</sub> (30 nm, 5 mol%) / B-EBL (7 nm) / BH:DH (15 nm) / TPBI (18 nm) / LiF (1 nm) / Al (100 nm)

**Device E :** ITO / AQ1200 (30 nm) / X-HTL (25 nm) / PCIC:Ir(mppy)<sub>3</sub> (30 nm, 5 mol%) / B-EBL (5 nm) / BH:DH (15 nm) / TPBI (20 nm) / LiF (1 nm) / Al (100 nm)

**Device F :** ITO / AQ1200 (20 nm) / X-HTL (35 nm) / PCIC:Ir(mppy)<sub>3</sub> (30 nm, 5 mol%) / B-EBL (5 nm) / BH:DH (15 nm) / TPBI (20 nm) / LiF (1 nm) / Al (100 nm)

**HOD A :** PEDOT:PSS (40 nm) / PCIC (30 nm) / MoO<sub>3</sub> (1 nm) / Al (100 nm)

**HOD B :** PEDOT:PSS (40 nm) / PCIC:Ir(mppy)<sub>3</sub> (30 nm, 5 mol%) / MoO<sub>3</sub> (1 nm) / Al (100 nm)

**EOD A :** ZnO and PEI (40 nm) / PCIC (30 nm) / Al (100 nm)

**EOD B :** ZnO and PEI (40 nm) / PCIC:Ir(mppy)<sub>3</sub> (30 nm, 5 mol%) / Al (100 nm)

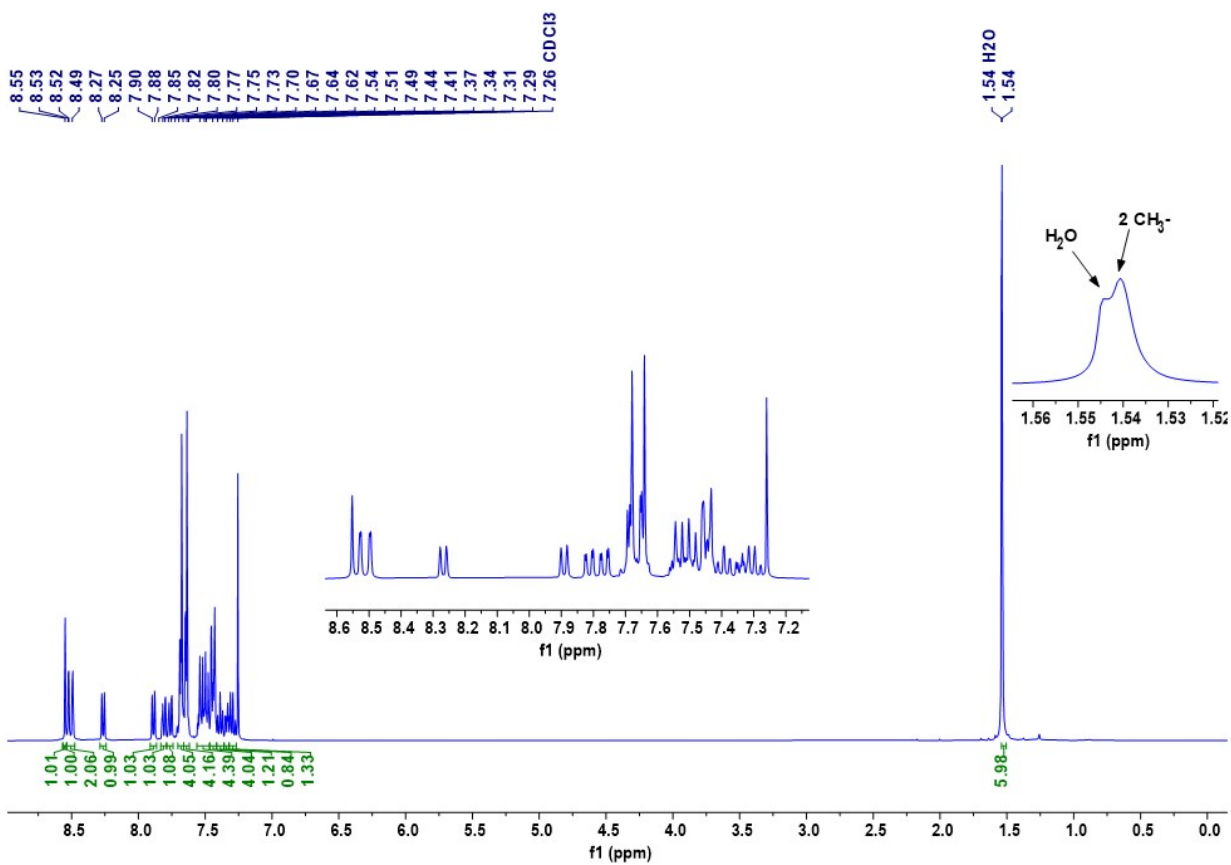

**Figure 1S.** <sup>1</sup>H NMR spectrum of PCIC in CDCl<sub>3</sub>.

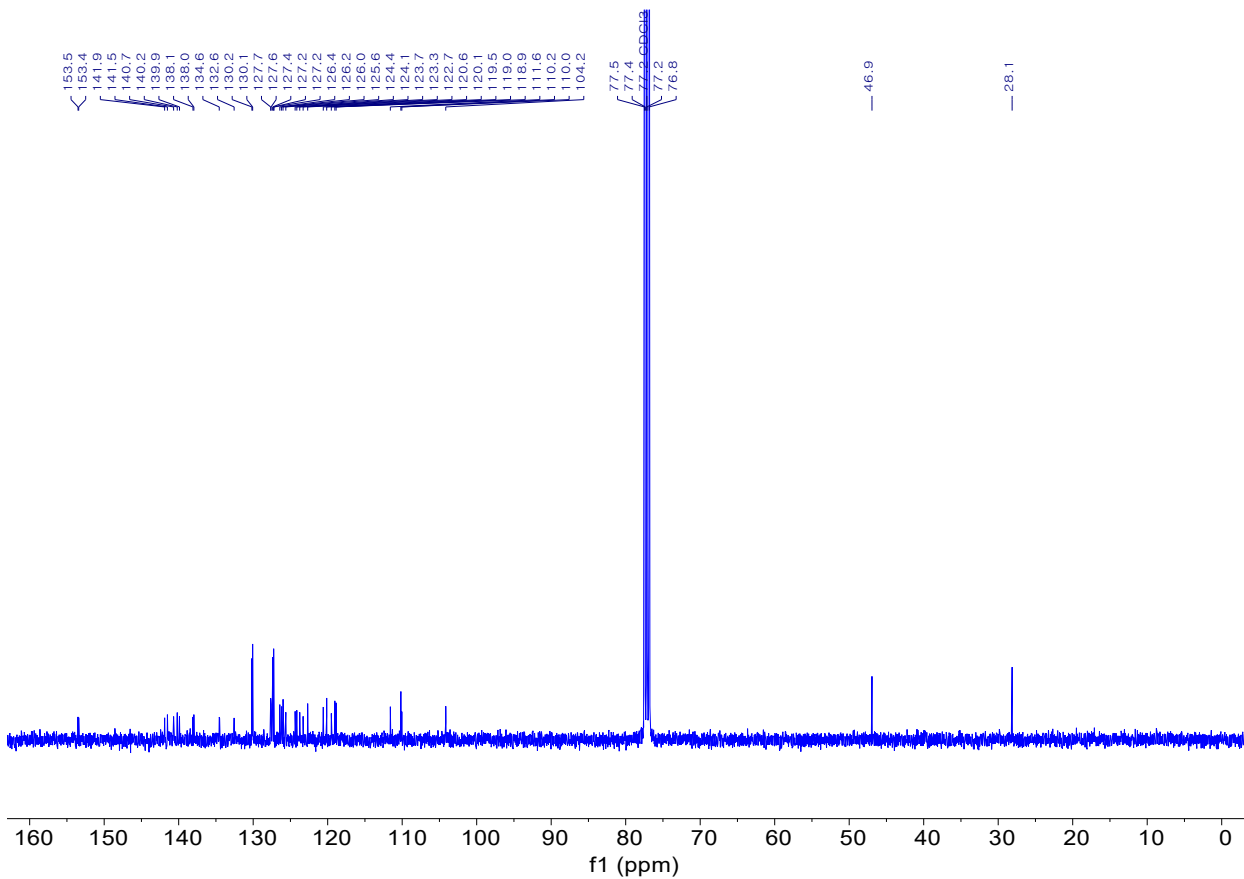

**Figure 2S.**  $^{13}\text{C}$  NMR spectrum of PCIC in  $\text{CDCl}_3$ .

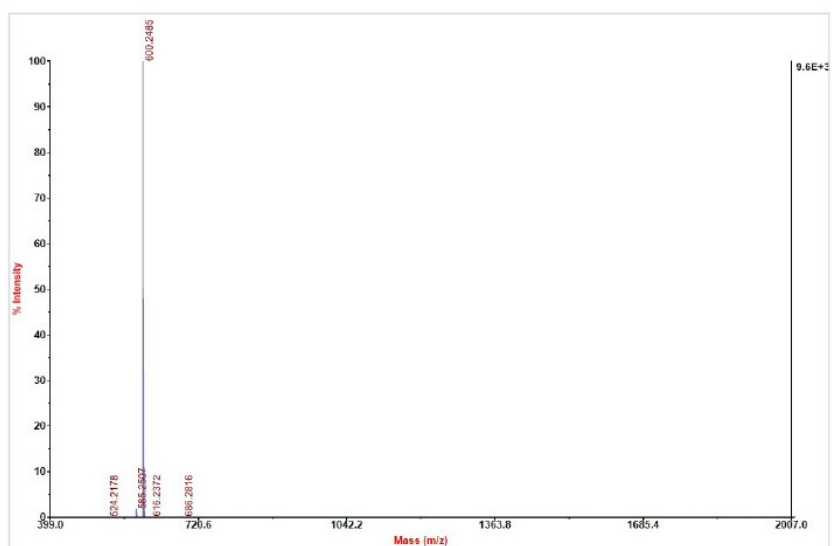

**Figure 3S.** MALDI-TOF mass spectrum of PCPI.

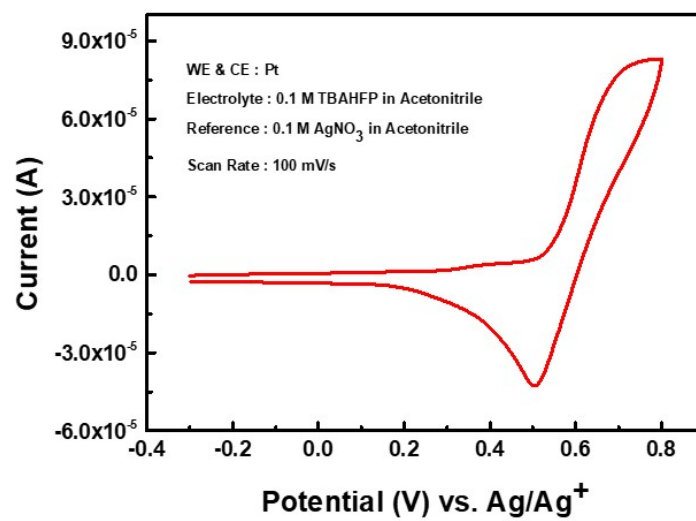

**Figure 4S.** Cyclic voltammogram of PCIC.

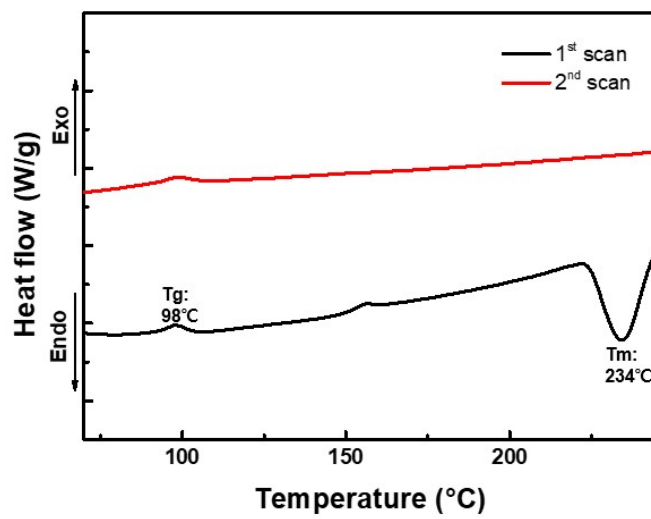

**Figure 5S.** DSC Curves of PCIC.

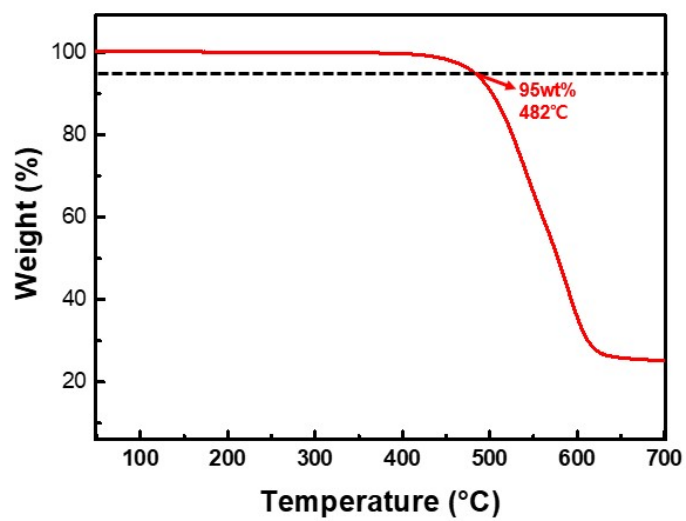

**Figure 6S.** TGA Curve of PCIC in CDCl<sub>3</sub>.
